# Supplementary material for: Characterization of the clomazone sorption process in four agricultural soils using different kinetic models
Source: Royal Society of Chemistry journal article supplement (doi:10.1039/d2em00272h), 2023-01-01
Supplement: d2em00272h1.pdf [file d2em00272h1.pdf]

*Supplemental Information for:*

Characterization of clomazone sorption process in four agricultural soils using different kinetic models

Rada Đurović-Pejčev,<sup>\*a</sup> Svjetlana Radmanović<sup>b</sup>, Zorica P. Tomić<sup>b</sup>, Lazar Kaluđerović<sup>b</sup> and Tijana Đorđević<sup>a</sup>

<sup>a</sup>Institute of Pesticides and Environmental Protection, Banatska 31b, 11080 Belgrade, Serbia.

<sup>b</sup>University of Belgrade, Faculty of Agriculture, Nemanjina 6, 11080 Belgrade, Serbia.

\*Correspondence to: [rajcica76@gmail.com](mailto:rajcica76@gmail.com); [rada.djurovic@pesting.org.rs](mailto:rada.djurovic@pesting.org.rs)

**Electronic supplementary information (ESI) for Environmental Science: Processes & Impacts.**

Contents

|               |    |
|---------------|----|
| Table S1..... | S3 |
| Table S2..... | S4 |
| Table S3..... | S5 |
| Table S4..... | S6 |
| Table S5..... | S7 |
| Table S6..... | S8 |
| Table S7..... | S9 |

**Electronic supplementary information (ESI) for Environmental Science: Processes & Impacts.**

Table S1 Kinetic parameters predicted from the nonlinear analysis of hyperbolic model, and the linear analysis of pseudo-first- and pseudo-second-order kinetic models (the all set of soil/solution contact times is taken)

| Soil                                            | RG (Regosol)          |                      | PL (Planosol)        |                      | CH (Chernozem)       |                      | VR (Vertisol)         |                      |
|-------------------------------------------------|-----------------------|----------------------|----------------------|----------------------|----------------------|----------------------|-----------------------|----------------------|
| Parameters / Initial conc.(mg L <sup>-1</sup> ) | 0.5                   | 15                   | 0.5                  | 15                   | 0.5                  | 15                   | 0.5                   | 15                   |
| $q_{\max \text{ exp}}$ (mg kg <sup>-1</sup> )   | 0.97±0.01             | 27.90±0.19           | 1.11±0.02            | 31.44±0.22           | 1.18±0.04            | 32.62±0.06           | 1.31±0.02             | 35.32±0.08           |
| <b>Hyperbolic</b>                               |                       |                      |                      |                      |                      |                      |                       |                      |
| $q_{\max}$ (mg kg <sup>-1</sup> )               | 1.05±0.03             | 26.58±0.32           | 1.14±0.01            | 30.38±0.52           | 1.23±0.01            | 30.90±0.51           | 1.37±0.02             | 34.41±0.28           |
| R <sup>2</sup>                                  | 0.974                 | 0.985                | 0.992                | 0.965                | 0.993                | 0.966                | 0.979                 | 0.991                |
| Reduced chi-square                              | 26.4×10 <sup>-4</sup> | 0.727                | 7.7×10 <sup>-4</sup> | 2.142                | 7.6×10 <sup>-4</sup> | 2.113                | 28.9×10 <sup>-4</sup> | 0.684                |
| AIC*                                            | -83.025               | 1.251                | -101.475             | 17.461               | -101.627             | 17.260               | -81.654               | 0.337                |
| <b>Pseudo-first order</b>                       |                       |                      |                      |                      |                      |                      |                       |                      |
| $q_{\max}$ (mg kg <sup>-1</sup> )               | 0.50±0.06             | 6.41±0.26            | 0.17±0.03            | 7.72±0.46            | 0.22±0.08            | 6.54±0.20            | 0.09±0.04             | 3.27±0.29            |
| $k_1$ (h <sup>-1</sup> )                        | 0.33±0.02             | 0.15±0.01            | 0.29±0.02            | 0.32±0.01            | 0.47±0.07            | 0.19±0.01            | 0.53±0.09             | 0.14±0.01            |
| R <sup>2</sup>                                  | 0.811                 | 0.891                | 0.597                | 0.947                | 0.528                | 0.955                | 0.472                 | 0.586                |
| Residual sum of squares                         | 1.035                 | 0.106                | 2.220                | 0.227                | 7.834                | 0.070                | 12.663                | 0.545                |
| AIC                                             | -0.749                | 103.035              | 7.159                | 107.891              | 8.399                | 108.737              | 12.425                | 112.384              |
| <b>Pseudo-second order</b>                      |                       |                      |                      |                      |                      |                      |                       |                      |
| $q_{\max}$ (mg kg <sup>-1</sup> )               | 1.01±0.01             | 27.85±0.25           | 1.11±0.01            | 32.57±0.29           | 1.20±0.01            | 32.89±0.19           | 1.32±0.01             | 35.46±0.17           |
| $k_2$ (kg mg <sup>-1</sup> h <sup>-1</sup> )    | 1.16±0.12             | 0.11±0.00            | 5.21±0.02            | 0.09±0.00            | 3.05±0.02            | 0.11±0.00            | 4.93±0.02             | 0.18±0.00            |
| $h$ (mg kg <sup>-1</sup> h <sup>-1</sup> )      | 1.19±0.12             | 85.47±0.25           | 6.45±0.03            | 91.74±0.28           | 4.41±0.03            | 113.64±1.91          | 8.62±0.03             | 227.27±1.70          |
| R <sup>2</sup>                                  | 0.998                 | 0.999                | 0.999                | 0.999                | 0.999                | 0.999                | 0.999                 | 0.999                |
| Residual sum of squares                         | 1.249                 | 5.4×10 <sup>-4</sup> | 0.078                | 7.3×10 <sup>-4</sup> | 0.107                | 3.1×10 <sup>-4</sup> | 0.110                 | 2.6×10 <sup>-4</sup> |
| AIC                                             | -83.025               | 1.251                | -101.475             | 17.461               | -101.627             | 17.260               | -81.654               | 0.337                |

\* AIC - Akaike's Information Criterion Test.

**Electronic supplementary information (ESI) for Environmental Science: Processes & Impacts.**

Table S2 Pearson correlation between clomazone sorption parameters obtained by hyperbolic and pseudo-first-order kinetic models and selected soil properties<sup>a</sup>

|      | Hyperbolic model       |               |               |               | Pseudo-first order model                    |               |               |               |
|------|------------------------|---------------|---------------|---------------|---------------------------------------------|---------------|---------------|---------------|
|      | $q_{\max \text{ exp}}$ |               | $q_{\max}$    |               | $q_{\max}$                                  |               | $k_1$         |               |
|      |                        |               |               |               | Initial concentration (mg L <sup>-1</sup> ) |               |               |               |
|      | 0.5                    | 15            | 0.5           | 15            | 0.5                                         | 15            | 0.5           | 15            |
| OC   | 0.873 (0.127)          | 0.853 (0.147) | 0.886 (0.114) | 0.788 (0.201) | 0.670 (0.330)                               | 0.599 (0.401) | 0.935 (0.065) | 0.370 (0.630) |
| Clay | 0.869 (0.131)          | 0.879 (0.121) | 0.845 (0.155) | 0.924 (0.076) | 0.882 (0.118)                               | 0.656 (0.344) | 0.529 (0.471) | 0.038 (0.962) |
| pH   | 0.413 (0.587)          | 0.465 (0.535) | 0.318 (0.682) | 0.531 (0.469) | 0.708 (0.292)                               | 0.029 (0.971) | 0.150 (0.850) | 0.652 (0.348) |
| Silt | 0.579 (0.421)          | 0.636 (0.364) | 0.455 (0.545) | 0.627 (0.373) | 0.855 (0.145)                               | 0.156 (0.844) | 0.105 (0.895) | 0.692 (0.308) |
| Sand | 0.839 (0.161)          | 0.874 (0.126) | 0.764 (0.236) | 0.898 (0.102) | 0.981* (0.019)                              | 0.349 (0.651) | 0.392 (0.608) | 0.358 (0.642) |

<sup>a</sup> OC-organic carbon content. Values in parentheses are *p* values of the correlations.

\* Significance at the 0.05 level.

**Electronic supplementary information (ESI) for Environmental Science: Processes & Impacts.**

Table S3 Pearson correlation between clomazone sorption parameters obtained by pseudo-second-order kinetic model and selected soil properties<sup>a</sup>

|      | Pseudo-second order model                   |               |                |               |                |               |
|------|---------------------------------------------|---------------|----------------|---------------|----------------|---------------|
|      | $q_{\max}$                                  |               | $k_2$          |               | h              |               |
|      | Initial concentration (mg L <sup>-1</sup> ) |               |                |               |                |               |
|      | 0.5                                         | 15            | 0.5            | 15            | 0.5            | 15            |
| OC   | 0.901 (0.099)                               | 0.788 (0.212) | 0.350 (0.650)  | 0.611 (0.389) | 0.565 (0.435)  | 0.698 (0.302) |
| Clay | 0.836 (0.164)                               | 0.893 (0.107) | 0.868 (0.132)  | 0.713 (0.287) | 0.974* (0.026) | 0.851 (0.149) |
| pH   | 0.326 (0.673)                               | 0.580 (0.420) | 0.917 (0.083)  | 0.102 (0.898) | 0.783 (0.217)  | 0.290 (0.710) |
| Silt | 0.500 (0.500)                               | 0.748 (0.252) | 0.871 (0.129)  | 0.086 (0.914) | 0.734 (0.266)  | 0.166 (0.834) |
| Sand | 0.781 (0.219)                               | 0.936 (0.064) | 0.980* (0.020) | 0.419 (0.581) | 0.982* (0.018) | 0.629 (0.371) |

<sup>a</sup> OC-organic carbon content. Values in parentheses are *p* values of the correlations.

\* Significance at the 0.05 level.

**Electronic supplementary information (ESI) for Environmental Science: Processes & Impacts.**

Table S4 Kinetic parameters predicted from the linear analysis of Elovich and intraparticle diffusion (IPD) models, and nonlinear analysis of intraparticle diffusion dimensionless (IPDD) and two-site nonequilibrium model (TSNE) (the all set of soil/solution contact times is taken)

| Soil                                                          | RG (Regosol)         |                            | PL (Planosol)        |                            | CH (Chernozem)       |                            | VR (Vertisol)        |                             |
|---------------------------------------------------------------|----------------------|----------------------------|----------------------|----------------------------|----------------------|----------------------------|----------------------|-----------------------------|
| Parameters / Initial conc.(mg L <sup>-1</sup> )               | 0.5                  | 15                         | 0.5                  | 15                         | 0.5                  | 15                         | 0.5                  | 15                          |
| Elovich                                                       |                      |                            |                      |                            |                      |                            |                      |                             |
| K <sub>d</sub> (exp)<br>(mL g <sup>-1</sup> )                 | 3.19±0,11            | 3.00±0,14                  | 4.01±0,09            | 3.65±0,11                  | 4.54±0,13            | 3.89±0,15                  | 5.58±0,09            | 4.51±0,13                   |
| (1/Y)ln(XY)<br>(mg kg <sup>-1</sup> )                         | 0.52±0.03            | 22.03±0.23                 | 0.86±0.03            | 26.54±0.19                 | 0.86±0.03            | 27.66±0.21                 | 1.02±0.04            | 32.08±0.21                  |
| 1/Y (mg kg <sup>-1</sup> )                                    | 0.18±0.02            | 1.97±0.13                  | 0.11±0.02            | 1.81±0.11                  | 0.14±0.02            | 1.58±0.12                  | 0.13±0.02            | 1.10±0.12                   |
| X<br>(mg kg <sup>-1</sup> h <sup>-1</sup> )                   | 3.2±0.0              | (14.4±0.3)×10 <sup>4</sup> | 329.5±5.0            | (42.4±0.1)×10 <sup>5</sup> | 66.3±1.0             | (63.7±0.2)×10 <sup>6</sup> | 252.3±4.5            | (54.3±0.2)×10 <sup>11</sup> |
| %*                                                            | 53.48±3.10           | 78.96±0.82                 | 77.93±2.71           | 84.41±0.60                 | 72.72±2.53           | 84.79±0.64                 | 77.48±3.05           | 90.83±0.59                  |
| R <sup>2</sup>                                                | 0.907                | 0.952                      | 0.779                | 0.959                      | 0.857                | 0.936                      | 0.738                | 0.880                       |
| Residual sum of squares                                       | 0.086                | 5.049                      | 0.085                | 3.644                      | 0.085                | 4.42                       | 0.168                | 4.265                       |
| IPD                                                           |                      |                            |                      |                            |                      |                            |                      |                             |
| k <sub>int,1</sub> (mg kg <sup>-1</sup> min <sup>-0.5</sup> ) | 0.06±0.00            | 1.27±0.09                  | 0.07±0.00            | 0.23±0.02                  | 0.06±0.00            | 0.20±0.02                  | 0.09±0.00            | 0.13±0.02                   |
| C (mg kg <sup>-1</sup> )                                      | 0.03±0.00            | 13.14±0.57                 | 0.34±0.04            | 24.68±0.39                 | 0.38±0.06            | 26.00±0.35                 | 0.31±0.03            | 31.05±0.42                  |
| R <sup>2</sup>                                                | 0.993                | 0.989                      | 0.976                | 0.921                      | 0.943                | 0.917                      | 0.992                | 0.872                       |
| Residual sum of squares                                       | 0.00267              | 0.14666                    | 0.00381              | 7.03462                    | 0.01323              | 5.75264                    | 0.00236              | 8.10803                     |
| k <sub>int,2</sub> (mg kg <sup>-1</sup> min <sup>-0.5</sup> ) | 0.001±0.000          | 0.15±0.01                  | 0.0005±0.0002        |                            | 0.002±0.001          |                            | 0.0002±0.0001        |                             |
| C (mg kg <sup>-1</sup> )                                      | 0.92±0.01            | 22.30±0.28                 | 1.09±0.01            |                            | 1.13±0.01            |                            | 1.31±0.01            |                             |
| R <sup>2</sup>                                                | 0.741                | 0.947                      | 0.430                |                            | 0.559                |                            | 0.698                |                             |
| Residual sum of squares                                       | 1.6×10 <sup>-4</sup> | 1.384                      | 3.5×10 <sup>-6</sup> |                            | 0.004                |                            | 6.9×10 <sup>-5</sup> |                             |
| IPDD                                                          |                      |                            |                      |                            |                      |                            |                      |                             |
| R <sub>i</sub>                                                | 1.00±0.02            | 0.44±0.02                  | 0.65±0.03            | 0.24±0.01                  | 0.60±0.04            | 0.19±0.01                  | 0.76±0.02            | 0.12±0.01                   |
| R <sup>2</sup>                                                | 0.989                | 0.987                      | 0.968                | 0.907                      | 0.917                | 0.870                      | 0.991                | 0.751                       |
| Reduced chi-square                                            | 6.6×10 <sup>-4</sup> | 1.1×10 <sup>-4</sup>       | 9.1×10 <sup>-4</sup> | 5.9×10 <sup>-4</sup>       | 0.003                | 6.5×10 <sup>-4</sup>       | 2.9×10 <sup>-4</sup> | 5.4×10 <sup>-4</sup>        |
| TSNE                                                          |                      |                            |                      |                            |                      |                            |                      |                             |
| K (ml g <sup>-1</sup> )                                       | 3.23±0.03            | 2.81±0.01                  | 3.98±0.01            | 3.86±0.02                  | 4.55±0.01            | 3.93±0.02                  | 5.67±0.02            | 4.46±0.02                   |
| F                                                             | 0.016±0.003          | 0.579±0.062                | 0.227±0.010          | 0.656±0.051                | 0.216±0.011          | 0.695±0.051                | 0.167±0.012          | 0.790±0.082                 |
| k <sub>2</sub> (h <sup>-1</sup> )                             | 0.310±0.036          | 0.461±0.091                | 0.819±0.029          | 0.149±0.036                | 0.557±0.029          | 0.155±0.034                | 0.692±0.051          | 0.301±0.090                 |
| R <sup>2</sup>                                                | 0.974                | 0.896                      | 0.996                | 0.935                      | 0.993                | 0.943                      | 0.982                | 0.842                       |
| Reduced chi-square                                            | 4.5×10 <sup>-4</sup> | 1.4×10 <sup>-4</sup>       | 1.8×10 <sup>-5</sup> | 8.2×10 <sup>-5</sup>       | 5.3×10 <sup>-5</sup> | 5.5×10 <sup>-5</sup>       | 1.4×10 <sup>-4</sup> | 7.4×10 <sup>-5</sup>        |

**Electronic supplementary information (ESI) for Environmental Science: Processes & Impacts.**

Table S5 Pearson correlation between clomazone sorption parameters obtained by Elovich model and selected soil properties<sup>a</sup>

|      | Elovich model  |               |                                             |               |                 |               |
|------|----------------|---------------|---------------------------------------------|---------------|-----------------|---------------|
|      | (1/Y) ln(XY)   |               | 1/Y                                         |               | X               |               |
|      |                |               | Initial concentration (mg L <sup>-1</sup> ) |               |                 |               |
|      | 0.5            | 15            | 0.5                                         | 15            | 0.5             | 15            |
| OC   | 0.758 (0.242)  | 0.823 (0.177) | 0.317 (0.683)                               | 0.843 (0.157) | 0.076 (0.924)   | 0.556 (0.444) |
| Clay | 0.888 (0.112)  | 0.911 (0.089) | 0.701 (0.299)                               | 0.850 (0.150) | 0.796 (0.204)   | 0.849 (0.150) |
| pH   | 0.618 (0.382)  | 0.489 (0.511) | 0.864 (0.136)                               | 0.291 (0.709) | 0.993** (0.007) | 0.337 (0.663) |
| Silt | 0.789 (0.211)  | 0.599 (0.401) | 0.970* (0.030)                              | 0.345 (0.655) | 0.605 (0.222)   | 0.081 (0.919) |
| Sand | 0.953* (0.047) | 0.876 (0.124) | 0.920 (0.080)                               | 0.715 (0.285) | 0.889 (0.111)   | 0.587 (0.413) |

<sup>a</sup> OC-organic carbon content. Values in parentheses are *p* values of the correlations.

\* Significance at the 0.05 level.

\* Significance at the 0.01 level.

**Electronic supplementary information (ESI) for Environmental Science: Processes & Impacts.**

Table S6 Pearson correlation between clomazone sorption parameters obtained by intraparticle diffusion (Weber-Morris model) and intraparticle diffusion dimensionless models and selected soil properties<sup>a</sup>

|      | Intraparticle diffusion model |               |                                             |               |               |               | Intraparticle diffusion dimensionless model |               |
|------|-------------------------------|---------------|---------------------------------------------|---------------|---------------|---------------|---------------------------------------------|---------------|
|      | $k_{int,1}$                   |               | $C_1$                                       |               | $k_{int,2}$   | $C_2$         | $R_i$                                       |               |
|      |                               |               | Initial concentration (mg L <sup>-1</sup> ) |               |               |               |                                             |               |
|      | 0.5                           | 15            | 0.5                                         | 15            | 0.5           | 0.5           | 0.5                                         | 15            |
| OC   | 0.458 (0.542)                 | 0.716 (0.284) | 0.681 (0.319)                               | 0.802 (0.198) | 0.239 (0.761) | 0.816 (0.184) | 0.577 (0.423)                               | 0.843 (0.157) |
| Clay | 0.943 (0.057)                 | 0.740 (0.260) | 0.563 (0.437)                               | 0.965 (0.135) | 0.677 (0.323) | 0.917 (0.083) | 0.382 (0.617)                               | 0.824 (0.176) |
| pH   | 0.573 (0.427)                 | 0.598 (0.402) | 0.496 (0.504)                               | 0.561 (0.439) | 0.734 (0.266) | 0.491 (0.509) | 0.422 (0.578)                               | 0.497 (0.503) |
| Silt | 0.261 (0.739)                 | 0.913 (0.087) | 0.936 (0.064)                               | 0.771 (0.229) | 0.091 (0.909) | 0.583 (0.416) | 0.931 (0.069)                               | 0.761 (0.239) |
| Sand | 0.735 (0.265)                 | 0.917 (0.083) | 0.814 (0.186)                               | 0.929 (0.071) | 0.481 (0.519) | 0.873 (0.127) | 0.695 (0.305)                               | 0.898 (0.102) |

<sup>a</sup> OC-organic carbon content. Values in parentheses are *p* values of the correlations.



**Electronic supplementary information (ESI) for Environmental Science: Processes & Impacts.**

Table S7 Pearson correlation between clomazone sorption parameters obtained by two-site nonequilibrium (TSNE) model and selected soil properties<sup>a</sup>

|      | Two-site nonequilibrium model |               |               |               |                                             |               |               |               |
|------|-------------------------------|---------------|---------------|---------------|---------------------------------------------|---------------|---------------|---------------|
|      | $K_d$ (exp)                   |               | K             |               | F                                           |               | $k_2$         |               |
|      |                               |               |               |               | Initial concentration (mg L <sup>-1</sup> ) |               |               |               |
|      | 0.5                           | 15            | 0.5           | 15            | 0.5                                         | 15            | 0.5           | 15            |
| OC   | 0.869 (0.131)                 | 0.849 (0.151) | 0.867 (0.133) | 0.787 (0.213) | 0.531 (0.469)                               | 0.853 (0.147) | 0.276 (0.724) | 0.419 (0.581) |
| Clay | 0.871 (0.129)                 | 0.890 (0.110) | 0.868 (0.132) | 0.886 (0.114) | 0.515 (0.485)                               | 0.887 (0.113) | 0.757 (0.243) | 0.309 (0.691) |
| pH   | 0.379 (0.621)                 | 0.451 (0.549) | 0.359 (0.641) | 0.582 (0.418) | 0.583 (0.417)                               | 0.411 (0.588) | 0.914 (0.086) | 0.479 (0.521) |
| Silt | 0.510 (0.490)                 | 0.590 (0.410) | 0.474 (0.526) | 0.761 (0.239) | 0.981* (0.019)                              | 0.526 (0.474) | 0.933 (0.067) | 0.947 (0.053) |
| Sand | 0.808 (0.192)                 | 0.859 (0.141) | 0.788 (0.212) | 0.938 (0.062) | 0.805 (0.195)                               | 0.826 (0.174) | 0.938 (0.062) | 0.655 (0.345) |

<sup>a</sup> OC-organic carbon content. Values in parentheses are *p* values of the correlations.

\* Significance at the 0.05 level.
